# Supplementary material
Source: PubMed Central journal article supplement (PMC4355530)
Supplement: MCB.01230-14_zmb999100774so1.pdf [file MCB.01230-14_zmb999100774so1.pdf]

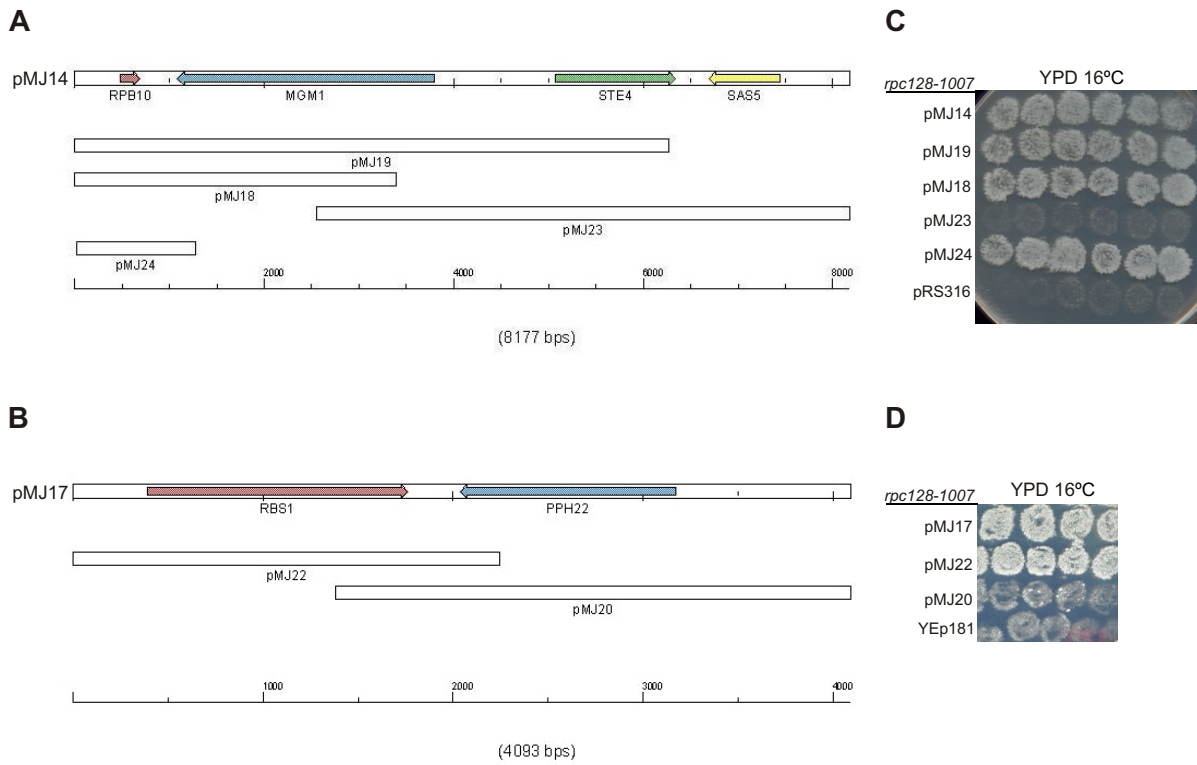

**Figure S1. Subcloning of *RPB10* and *RBS1* as overdose suppressors of *rpc128-1007* mutant.** (A) The genomic fragment in the pMJ14 plasmid cloned in the suppressor screen from the single copy library was subcloned into pRS316 resulting in pMJ19, pMJ18, pMJ23 and pMJ24 (construction of these plasmids is described in Materials and Methods). (B) The genomic insert in the pMJ17 plasmid cloned in the suppressor screen from the multicopy gene library on YEp13 multicopy vector was subcloned into YEp13, resulting in pMJ20 or YEp181 resulting in pMJ22 plasmids. (C, D) The plasmids were subsequently transformed into the MJ15-9C strain carrying *rpc128-1007*. Transformants were replica plated on YPD medium and incubated for 4 days at 16°C.
