# Supplementary material
Source: PubMed Central journal article supplement (PMC4355530)
Supplement: MCB.01230-14_zmb999100774so2.pdf [file MCB.01230-14_zmb999100774so2.pdf]

1 **Figure S1. Subcloning of *RPB10* and *RBS1* as overdose suppressors of *rpc128-1007* mutant.**

2 (A) The genomic fragment in the pMJ14 plasmid cloned in the suppressor screen from the single  
3 copy library was subcloned into pRS316 resulting in pMJ19, pMJ18, pMJ23 and pMJ24  
4 (construction of these plasmids is described in Materials and Methods). (B) The genomic insert in  
5 the pMJ17 plasmid cloned in the suppressor screen from the multicopy gene library on YEp13  
6 multicopy vector was subcloned into YEp13, resulting in pMJ20 or YEp181 resulting in pMJ22  
7 plasmids. (C, D) The plasmids were subsequently transformed into the MJ15-9C strain carrying  
8 *rpc128-1007*. Transformants were replica plated on YPD medium and incubated for 4 days at  
9 16°C.

10 **Table S1. Proteins that were co-purified with Rbs1-GFP.**

11 Rbs1-GFP fusion strains in Rbc128 wild-type and *rpc128-1007* mutant background were used for  
12 affinity purification on anti-GFP resin. Proteins co-purifying with the bait were analyzed by mass  
13 spectrometry and the results were compared to the parallel purification, carried out using the  
14 unmodified parental strain. Identified proteins were analyzed by MaxQuant software and protein  
15 abundance was calculated based on sum of intensities of identified peptides of given protein  
16 divided by its molecular weight. All the contaminants present in similar quantities in elutes from  
17 both the control sample and the tagged strain were removed from the table for better clarity. The  
18 table is sorted by the intensity of protein detected in mass spectrometry in wild-type compared to  
19 control (proteins for which the ratio intensity of sample/intensity of control were below ten were  
20 omitted). Proteins identified only in *rpc128-1007* strain were indicated in red. Selected proteins  
21 were indicated in color: Rbs1 in yellow, subunits of RNA polymerases in green, mitochondrial  
22 proteins in orange, proteins involved in nuclear-cytoplasmic transport in blue and prion protein in  
23 gray. Proteins identified only in *rpc128-1007* mutant were indicated in red.
